# Supplementary material
Source: publisher site journal article supplement (https://www.dovepress.com/article/511671)
Supplement: Supplementary file 1 [file get_supplementary_file.php]

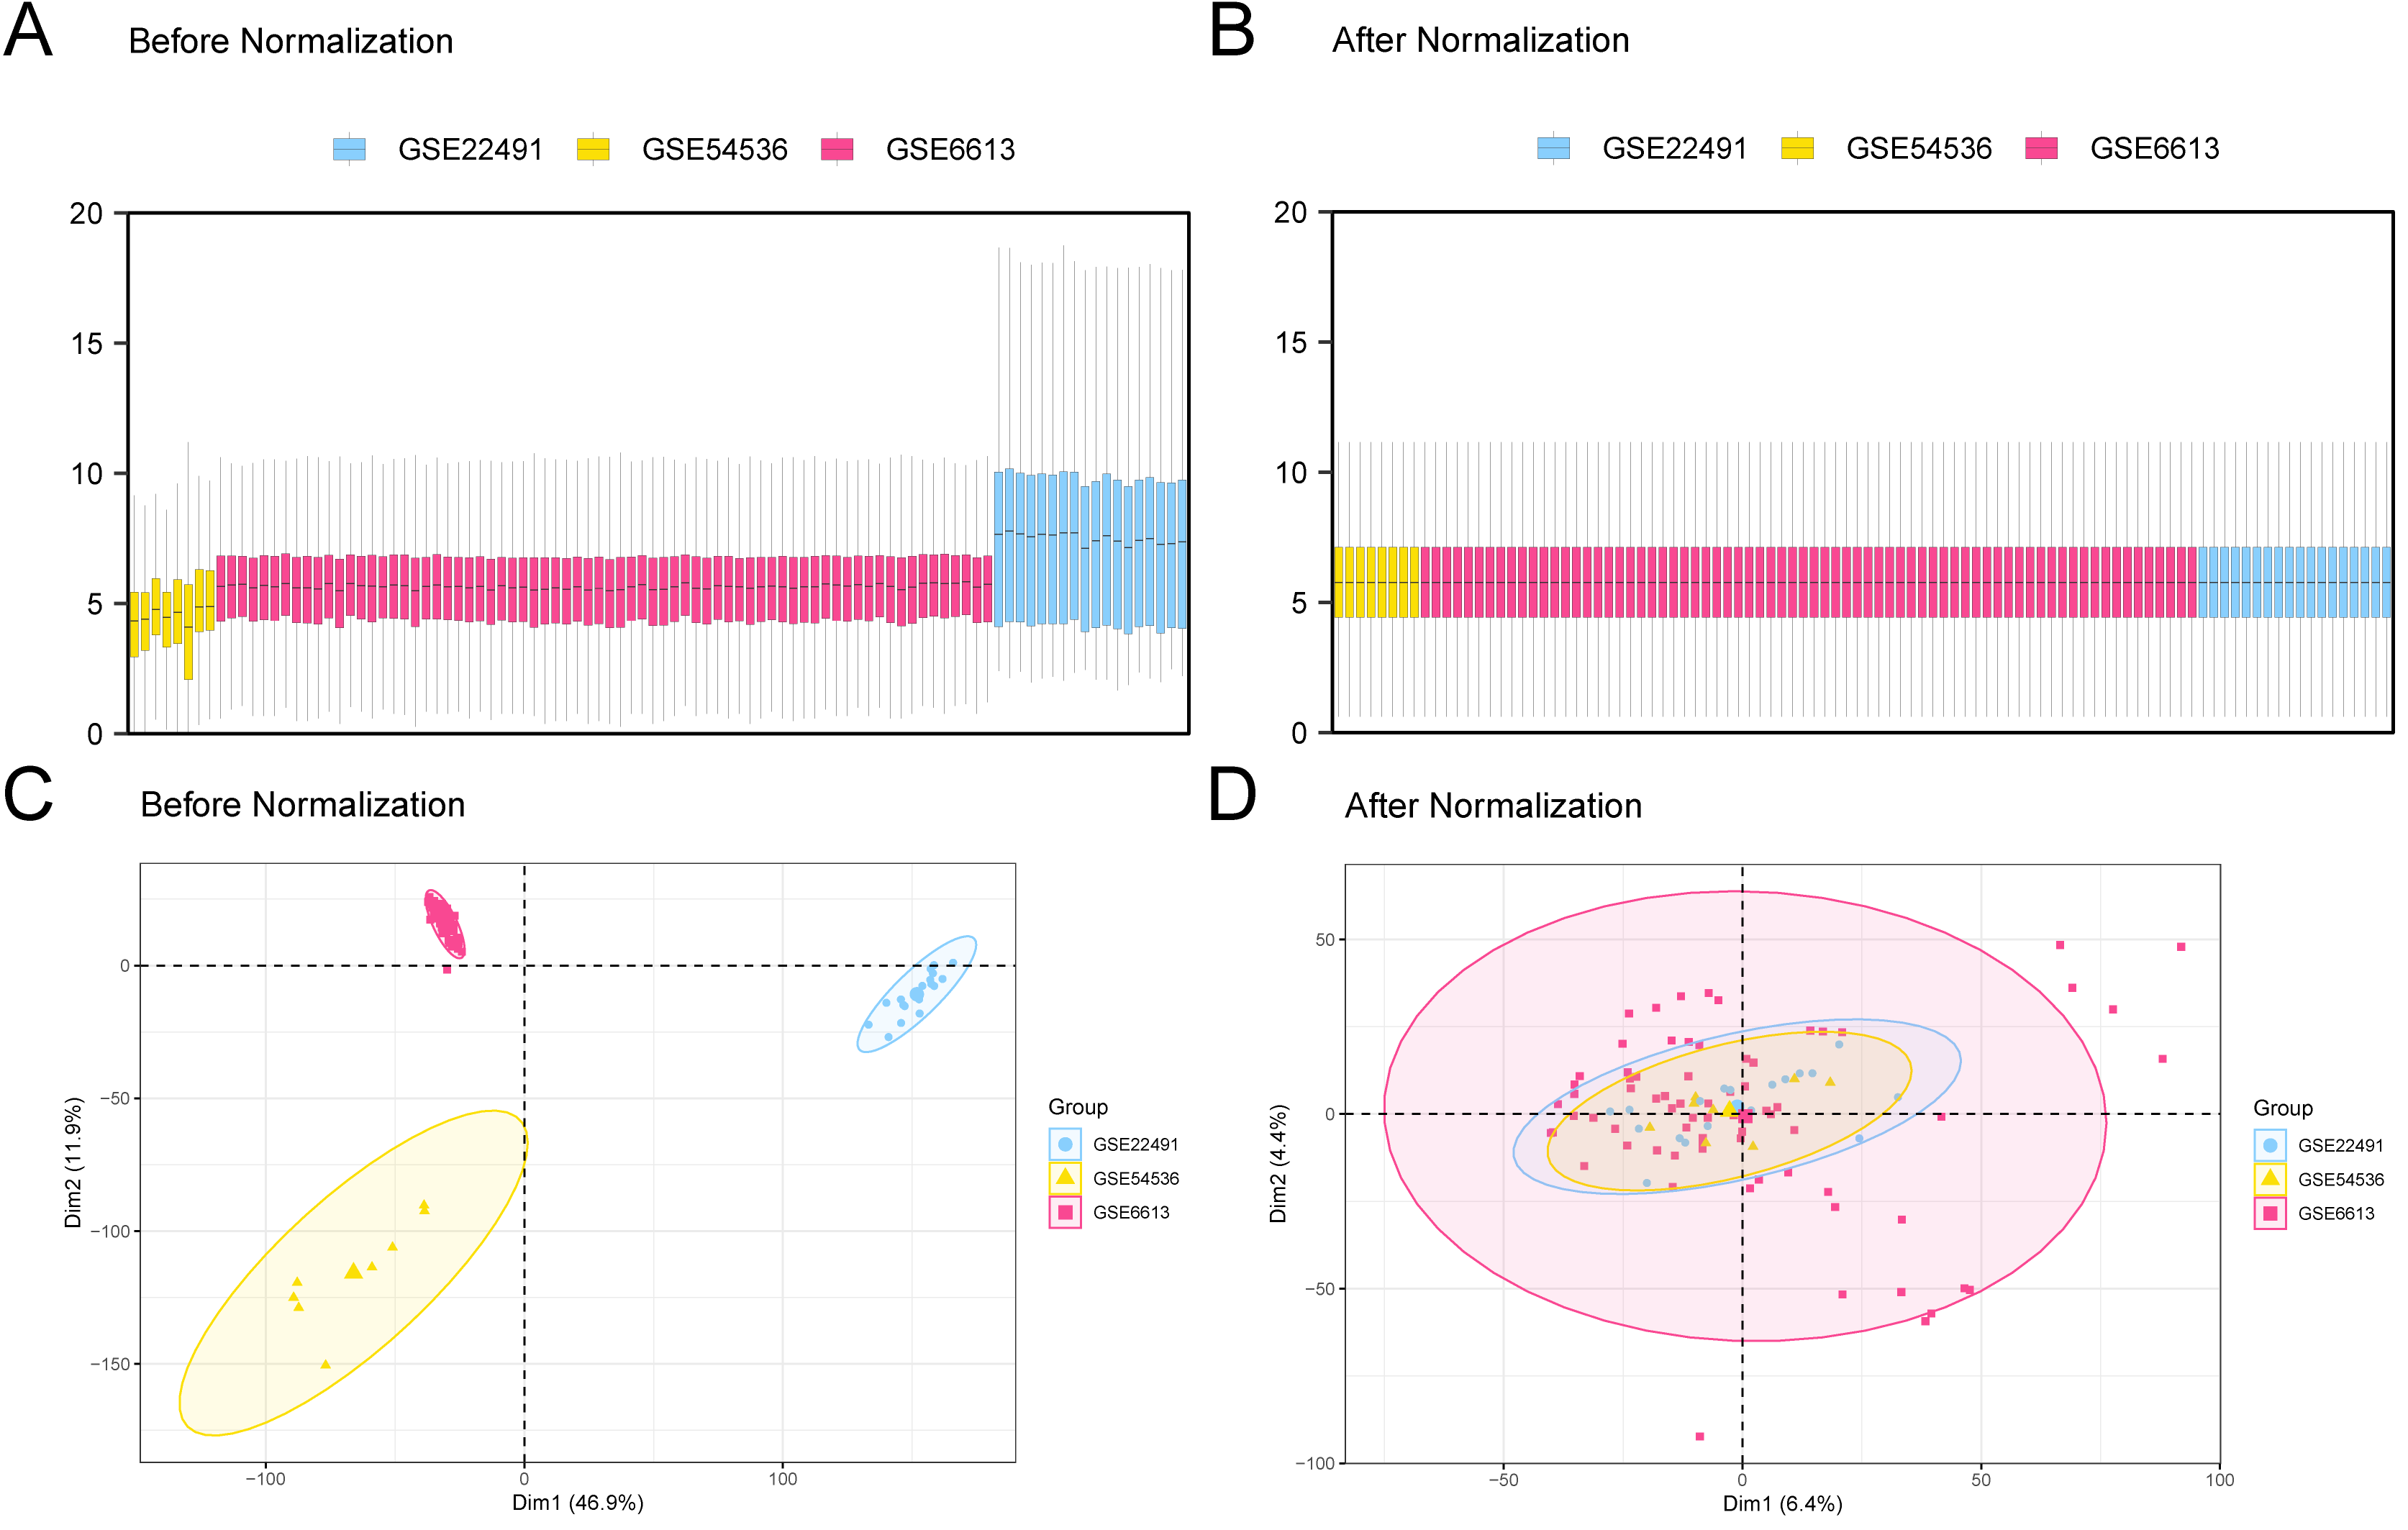


**Supplementary Fig.1**

The expression matrices of the GSE6613, GSE54536, and GSE22491 datasets were normalized. (A) Box plot of three datasets before batch correction; (B) Box plot of three datasets after batch correction. (C) PCA of three datasets before batch correction; (D) PCA of three datasets after batch correction.

**Table S1 Iron metabolism-related genes**

| Iron metabolism-related genes | | | | | |
| --- | --- | --- | --- | --- | --- |
| PRNP | GABARAPL2 | SQSTM1 | CYBRD1 | CEBPG | EPO |
| VDAC3 | GABARAPL1 | NQO1 | FBXL5 | SNORA16A | BCS1L |
| CYBB | ATG16L1 | EIF2S1 | FLVCR1 | RGS4 | ERFE |
| PCBP1 | WIPI1 | MUC1 | FTL | BLOC1S5-TXNDC5 | CRP |
| PCBP2 | WIPI2 | MT1G | NEDD8 | KIM-1 | HBB |
| ACSL1 | SNX4 | CISD1 | GLRX3 | IL6 | MT-CYB |
| ACSL5 | ATG13 | FANCD2 | HEPH | CXCL2 | FXN |
| ACSL6 | ULK2 | ELAVL1 | FTMT | RELA | PLA2G6 |
| ACSF2 | SAT1 | HSPA5 | HMOX2 | HSD17B11 | BMP2 |
| GCLM | EGFR | HELLS | LCN2 | AGPAT3 | HP |
| GSS | MAPK3 | SCD | MCOLN1 | SETD1B | SETX |
| MAP1LC3B | MAPK1 | FADS2 | RPS27A | HSPB1 | UNC13A |
| MAP1LC3C | BID | SRC | SKP1 | IREB2 | SURF1 |
| SAT2 | ZEB1 | STAT3 | SLC22A17 | MAPK14 | PRKCG |
| SLC11A2 | DPP4 | PML | SLC46A1 | MAFG | DNM1 |
| SLC39A14 | CDKN2A | MTOR | STEAP2 | IL33 | GRM1 |
| SLC39A8 | PEBP1 | NFS1 | GPX4 | NFE2L2 | NPC1 |
| ALOX12 | SOCS1 | TP63 | TCIRG1 | RPL8 | SCN8A |
| ALOX15 | CDO1 | CDKN1A | UBA52 | HAMP | STXBP1 |
| CS | MYB | MIR137 | UBB | SESN2 | CACNA1A |
| EMC2 | MAPK8 | ENPP2 | PTGS2 | SLC3A2 | MFN2 |
| ALOX5 | MAPK9 | FH | DUSP1 | DRD5 | SYNGAP1 |
| NOX1 | ATP5MC3 | CISD2 | NOS2 | DRD4 | PMM2 |
| NOX3 | GOT1 | MIR9-1 | NCF2 | MAP3K5 | AFG3L2 |
| NOX4 | PRKAA2 | MIR9-2 | MT3 | SLC2A1 | KCNJ10 |
| NOX5 | PRKAA1 | MIR9-3 | ALB | SLC2A3 | FLNC |
| DUOX1 | BAP1 | FTH1 | TXNRD1 | SLC2A6 | HARS1 |
| DUOX2 | ABCC1 | ISCU | SRXN1 | SLC2A8 | SATB2 |
| G6PD | MIR6852 | ACSL3 | GPX2 | SLC2A12 | TDP2 |
| PGD | ACVR1B | OTUB1 | BNIP3 | SLC2A14 | COQ8A |
| VDAC2 | TGFBR1 | CD44 | OXSR1 | EIF2AK4 | PNPLA6 |
| PIK3CA | EPAS1 | BRD4 | SELENOS | SLC40A1 | PTRH2 |
| FLT3 | HILPDA | PRDX6 | ANGPTL7 | SLC7A11 | SEPSECS |
| SCP2 | IFNG | MIR17 | HFE | STEAP3 | ATP6V0A1 |
| TP53 | ANO6 | NF2 | DDIT4 | TF | FGF14 |
| LPCAT3 | LPIN1 | ARNTL | ASNS | TFRC | KCNN2 |
| NRAS | CBS | HIF1A | TSC22D3 | UBC | MLC1 |
| KRAS | TNFAIP3 | JUN | DDIT3 | TFAP2C | SPTBN2 |
| HRAS | TLR4 | CA9 | JDP2 | SP1 | KIF1C |
| TFR2 | ATM | TMBIM4 | SLC1A4 | HBA1 | PEX6 |
| SLC38A1 | YY1AP1 | PLIN2 | PCK2 | NNMT | RNF14 |
| SLC1A5 | EGLN2 | MIR212 | TXNIP | PLIN4 | COQ4 |
| CARS1 | MIOX | Fer1HCH | VLDLR | HIC1 | PCDH12 |
| KEAP1 | TAZ | AIFM2 | GPT2 | STMN1 | SYNE1 |
| ATF3 | MTDH | LAMP2 | PSAT1 | RRM2 | SPART |
| ATG5 | IDH1 | ZFP36 | LURAP1L | CAPG | CEP104 |
| ATG7 | SIRT1 | PROM2 | SLC7A5 | HNF4A | KCNA6 |
| NCOA4 | FBXW7 | CHMP5 | HERPUD1 | NGB | KIF7 |
| ATF4 | PANX1 | CHMP6 | XBP1 | YWHAE | NCDN |
| ALOX12B | DNAJB6 | AKR1C1 | HMGB1 | GABPB1 | CIZ1 |
| ALOX15B | BACH1 | CAV1 | HMOX1 | AURKA | CSMD1 |
| ALOXE3 | ACSL4 | GCH1 | ZNF419 | MIR4715 | SNX14 |
| PHKG2 | LONP1 | HPX | KLHL24 | RIPK1 | MTCL1 |
| ACO1 | CHAC1 | LTF | TRIB3 | PRDX1 | MT-ATP6 |
| GLS2 | AKR1C2 | MT2A | ZFP69B | MIR30B | LRCH2 |
| ULK1 | AKR1C3 | MYC | ATP6V1G2 | HJV | C11orf65 |
| ATG3 | RB1 | SRI | VEGFA | TMPRSS6 | HERC2 |
| ATG4D | CP | ABCG2 | GDF15 | BMP6 | ALAS2 |
| BECN1 | HSF1 | CAND1 | TUBE1 | SLC11A1 | PCSK7 |
| MAP1LC3A | GCLC | CUL1 | ARRDC3 | PANK2 | UQCRFS1 |
| MB | COASY | C19orf12 |  |  |  |

**Table S2 All primer sequences used for RT-qPCR validation**

| **Primer name** | **Primer sequence (5’ to 3’)** |
| --- | --- |
| GAPDH-F (Internal reference) | 5-GGAGCGAGATCCCTCCAAAAT-3 |
| GAPDH-R (Internal reference) | 5-GGCTGTTGTCATACTTCTCATGG-3 |
| ACTB-F (Internal reference) | 5-CATGTACGTTGCTATCCAGGC-3 |
| ACTB-R (Internal reference) | 5-CTCCTTAATGTCACGCACGAT-3 |
| HNF4A-F | 5-CACGGGCAAACACTACGGT-3 |
| HNF4A-R | 5-TTGACCTTCGAGTGCTGATCC-3 |
| CHAC1-F | 5-GAACCCTGGTTACCTGGGC-3 |
| CHAC1-R | 5-CGCAGCAAGTATTCAAGGTTGT-3 |
| CDO1-F | 5-ATGGAACAGACCGAAGTGCTG-3 |
| CDO1-R | 5-CTTGGCGTACATTGCCCAC-3 |
| PNPLA6-F | 5-ACCTGGCTAACTCCCATCTG-3 |
| PNPLA6-R | 5-GGAAGAGTGGCTTCTCGAAGT-3 |
| SKP1-F | 5-GCCATTGTTTCCAGCTTCCC-3 |
| SKP1-R | 5-CAAGGGATGATCTGAGCCTGA-3 |
| ALAS2-F | 5-TGTCCGTCTGGTGTAGTAATGA-3 |
| ALAS2-R | 5-GCTCAAGCTCCACATGAAACT-3 |
